# Supplementary material for: Structure elucidation of prot, alkali and dealkaline lignin(s) by NMR, FT-IR and Py-GC/MS: effect of solid acid and base catalysts
Source: Royal Society of Chemistry journal article supplement (doi:10.1039/d3se00045a), 2023-01-01
Supplement: d3se00045a1.pdf [file d3se00045a1.pdf]

## Supplementary Information

### Structure elucidation of prot, alkali and dealkaline lignin(s) by NMR, FT-IR and Py-GC/MS: Effect of solid acid and base catalysts

Avnish Kumar<sup>1, 2</sup>, Bijoy Biswas<sup>3</sup>, Ramandeep Kaur<sup>1, 2</sup>, Reeta Rani<sup>4</sup>, Bhavya B Krishna<sup>1, 2</sup>, Thallada Bhaskar<sup>1, 2\*</sup>

<sup>1</sup>Sustainability Impact Assessment Area (SIA), Material Resource Efficiency Division (MRED), CSIR-Indian Institute of Petroleum (IIP), Dehradun 248005, India

<sup>2</sup>Academy of Scientific and Innovative Research (AcSIR), Ghaziabad-201002, India

<sup>3</sup>Biosystems Engineering Department, Auburn University, 200 Corley Building, Auburn, AL, 36849, USA

<sup>4</sup>Hindu College Moradabad, M.J.P.R.U. Bareilly, Uttar Pradesh-244001

\*Corresponding author: Ph No: +91 135 2525820, Fax No: +91 135 2660202;

e-mail: tbhaskar@iip.res.in; thalladab@yahoo.com

**Table S1:** Distribution of GC-MS compounds obtained from the flash pyrolysis of prot lignin

| RT, Minute   | Compound Name, Prot lignin              | Compound types  | Thermal     | MgO         | CaO         | ZSM-5       | Y-zeolite   |
|--------------|-----------------------------------------|-----------------|-------------|-------------|-------------|-------------|-------------|
| 7.20         | Phenol                                  | H-type          | 1.4         | -           | 1.2         | 3.1         | 3.4         |
| 8.43         | Phenol, 2-methyl                        | H-type          | -           | -           | -           | 1.4         | 2.0         |
| 8.80         | Phenol, 3-ethyl                         | H-type          | 2.4         | -           | -           | -           | -           |
| 8.81         | p-Cresol                                | H-type          | 1.0         | -           | 1.1         | 2.0         | -           |
| 10.24        | Phenol, 4-ethyl                         | H-type          | -           | 2.0         | 2.3         | 5.4         | 4.8         |
| 10.66        | Creosol                                 | H-type          | -           | -           | -           | -           | 7.7         |
| 11.29        | Phenol, 2-ethyl-4-methyl                | H-type          | -           | -           | -           | 2.7         | -           |
| 12.41        | Ethanone, 1-(2-hydroxy-5-methylphenyl)- | H-type          | 17.2        | 15.2        | 14.3        | 10.7        | 10.5        |
| <b>Total</b> |                                         | <b>(H-type)</b> | <b>22.0</b> | <b>17.2</b> | <b>18.9</b> | <b>25.3</b> | <b>28.4</b> |
| 9.04         | Mequinol/Phenol, 4-methoxy              | G-type          | 6.1         | 4.0         | 7.0         | 8.3         | 8.2         |
| 10.62        | 2-Methoxy-5-methylphenol                | G-type          | 7.0         | 4.8         | 6.5         | 8.3         | -           |
| 11.61        | 1,2-Benzenediol, 3-methoxy              | G-type          | 3.3         | -           | 2.9         | 3.4         | -           |
| 11.89        | Phenol, 4-ethyl-2-methoxy               | G-type          | 7.3         | 6.1         | 5.8         | 7.0         | 4.8         |
| 12.49        | 3-Methoxy-5-methylphenol                | G-type          | 0.3         | -           | -           | -           | -           |
| 12.96        | 3-Allyl-6-methoxyphenol                 | G-type          | 1.4         | 2.9         | 2.3         | 1.3         | -           |
| 13.11        | Phenol, 2-methoxy-4-propyl              | G-type          | 0.8         | -           | 0.9         | -           | -           |
| 13.59        | Vanillin                                | G-type          | 2.0         | 3.2         | 2.9         | -           | -           |
| 14.23        | Eugenol                                 | G-type          | 6.9         | 5.3         | 4.4         | -           | -           |
| 14.25        | trans-Isoeugenol                        | G-type          | 2.2         | 1.5         | -           | 3.1         | -           |
| 14.67        | Ethanone, 1-(3-hydroxy-4-               | G-type          | -           | 2.2         | 2.0         | 1.5         | -           |

|              |                                             |                      |                      |             |             |             |             |             |
|--------------|---------------------------------------------|----------------------|----------------------|-------------|-------------|-------------|-------------|-------------|
|              | methoxyphenyl)                              |                      |                      |             |             |             |             |             |
| 13.02        | Ethanone, 1-(2-hydroxy-6-methoxyphenyl)     | G-type               | 0.3                  | -           | -           | -           | -           | -           |
| 15.17        | 2-Propanone, 1-(4-hydroxy-3-methoxyphenyl)  | G-type               | -                    | 1.7         | 1.3         | -           | -           | -           |
| <b>Total</b> |                                             |                      | <b>G-type</b>        | <b>37.6</b> | <b>31.7</b> | <b>36.0</b> | <b>32.9</b> | <b>13.0</b> |
| 11.3         | 2,3-Dimethoxytoluene                        | S-type               | 0.4                  | -           | -           | -           | -           | -           |
| 12.88        | Phenol, 2,6-dimethoxy                       | S-type               | 10.3                 | 6.3         | 7.6         | 9.0         | 6.7         | -           |
| 14.13        | 3,5-Dimethoxy-4-hydroxytoluene              | S-type               | 7.8                  | 6.1         | 6.0         | 7.0         | 5.8         | -           |
| 15.61        | Ethanone, 1-(3,4-dimethoxyphenyl)           | S-type               | -                    | -           | 5.4         | -           | -           | -           |
| 16.60        | (E)-2,6-Dimethoxy-4-(prop-1-en-1-yl) phenol | S-type               | -                    | 1.6         | 1.0         | 2.4         | -           | -           |
| 16.90        | Ethanone, 1-(3,4,5-trimethoxyphenyl)        | S-type               | -                    | 0.9         | -           | -           | -           | -           |
| 17.20        | Phenol, 2,6-dimethoxy-4-(2-propenyl)        | S-type               | 0.6                  | 6.6         | 5.6         | -           | -           | -           |
| 17.53        | Acetosyringone                              | S-type               | -                    | 3.9         | 2.5         | 1.4         | -           | -           |
| <b>Total</b> |                                             |                      | <b>S-type</b>        | <b>19.1</b> | <b>25.4</b> | <b>28.1</b> | <b>19.8</b> | <b>12.5</b> |
| <b>4.67</b>  | Furfural                                    | Hetero cyclic        | 0.5                  | -           | -           | -           | -           | -           |
| <b>7.55</b>  | Oxazolidine, 2,2-diethyl-3-methyl           | Hetero cyclic        | 0.1                  | -           | -           | -           | -           | -           |
| <b>11.02</b> | Benzofuran, 2,3-dihydro                     | Hetero cyclic        | 10.1                 | 7.6         | 9.0         | 6.8         | 3.3         | -           |
| <b>12.25</b> | Benzofuran, 2,3-dihydro-2-methyl            | Hetero cyclic        | 0.4                  | -           | -           | -           | -           | -           |
| <b>Total</b> |                                             |                      | <b>Hetero cyclic</b> | <b>11.1</b> | <b>7.6</b>  | <b>9.0</b>  | <b>6.8</b>  | <b>3.3</b>  |
| 3.63         | Toluene                                     | Aromatic hydrocarbon | -                    | -           | -           | 2.3         | 5.0         | -           |
| 5.63         | o-Xylene                                    | Aromatic hydrocarbon | -                    | -           | -           | -           | 9.2         | -           |
| 5.73         | Benzene, 1,3-dimethyl                       | Aromatic hydrocarbon | -                    | -           | -           | 4.6         | -           | -           |
| 7.49         | Benzene, 1,2,3-trimethyl                    | Aromatic hydrocarbon | -                    | -           | -           | -           | 6.5         | -           |

|              |                                        |                              |            |             |            |            |             |
|--------------|----------------------------------------|------------------------------|------------|-------------|------------|------------|-------------|
| 9.56         | Benzene, 1,2,3,4-tetramethyl           | Aromatic hydro-carbon        | -          | -           | -          | -          | 6.9         |
| 11.96        | Benzene, pentamethyl                   | Aromatic hydro-carbon        | -          | -           | -          | -          | 6.5         |
| 14.29        | Benzene, hexamethyl                    | Aromatic hydro-carbon        | -          | -           | -          | -          | 2.2         |
| <b>Total</b> |                                        | <b>Aromatic hydro-carbon</b> |            |             |            | <b>6.9</b> | <b>36.3</b> |
| 10.07        | Benzene, 1-ethenyl-4-methoxy           | Other-type                   | -          | 1.6         | -          | -          | -           |
| 13.48        | Benzene, 4-ethenyl-1,2-dimethoxy       | Other-type                   | 2.0        | -           | -          | -          | -           |
|              |                                        | Other-type                   |            |             |            |            |             |
| 15.10        | Benzene, 1,2,3-trimethoxy-5-methyl     | Other-type                   | 2.8        | 3.1         | 2.5        | 2.7        | -           |
| 15.29        | o-Isopropylphenetole                   | Other-type                   | -          | -           | -          | -          | 2.1         |
| 15.59        | 2,5-Dimethoxy-4-ethylamphetamine       | Other-type                   | -          | -           | -          | -          | 4.4         |
| 15.60        | 2-(tert-Butyl)-4-methoxyphenyl acetate | Other-type                   | 4.8        | 6.2         | -          | 4.2        | -           |
| 15.93        | Phthalic acid, ethyl neopentyl ester   | Other-type                   | 0.2        | -           | -          | -          | -           |
| 19.57        | Hexadecanoic acid, methyl ester        | Other-type                   | -          | 3.8         | 0.9        | 1.4        | -           |
| 19.89        | Dibutyl phthalate                      | Other-type                   | -          | 2.2         | 4.6        | -          | -           |
| 21.25        | 9-Octadecenoic acid, methyl ester      | Other-type                   | -          | 1.2         | -          | -          | -           |
| <b>Total</b> |                                        | <b>Other-type</b>            | <b>9.8</b> | <b>18.1</b> | <b>8.0</b> | <b>8.3</b> | <b>6.5</b>  |

**Table S2:** Distribution of GC-MS compounds obtained from the flash pyrolysis of alkali lignin

| Ret Time     | Compound Name, Alkali lignin               | Compound types | Blank       | MgO         | CaO         | ZSM-5      | Y-zeolite   |
|--------------|--------------------------------------------|----------------|-------------|-------------|-------------|------------|-------------|
| 7.20         | Phenol                                     | H-type         | 0.7         | -           | 0.8         | 2.2        | 1.4         |
| 8.43         | Phenol, 2-methyl                           | H-type         | -           | -           | -           | 1.0        | -           |
| 8.80         | Phenol, 3-methyl                           | H-type         | -           | 0.7         | -           | 2.1        | 1.5         |
| 8.81         | p-Cresol                                   | H-type         | 0.8         | -           | 1.1         | -          | -           |
| 10.24        | Phenol, 4-ethyl                            | H-type         | 0.3         | -           | -           | 0.6        | -           |
| 10.66        | Creosol                                    | H-type         | 13.0        | -           | 18.4        | 1.6        | 1.4         |
| 11.59        | 1,2-Benzenediol, 3-methyl-                 | H-type         | -           | -           | 1.8         | -          | -           |
| 12.03        | 1,2-Benzenediol, 4-methyl                  | H-type         | 1.7         | -           | 1.3         | 2.1        | -           |
| 12.43        | 4-Hydroxy-2-methylacetophenone             | H-type         | 8.9         | 15          | 13.8        | -          | 11.5        |
| 12.80        | Phenol, 4-(2-propenyl)                     | H-type         | 0.3         | -           | -           | -          | -           |
| 13.32        | 1,3-Benzenediol, 4-ethyl                   | H-type         | 0.9         | -           | -           | -          | -           |
| <b>Total</b> |                                            | <b>H-type</b>  | <b>26.6</b> | <b>15.7</b> | <b>37.2</b> | <b>9.6</b> | <b>15.8</b> |
| 9.04         | Phenol, 4-methoxy/ Mequinol                | G-type         | 11.1        | 14.0        | 16.3        | 22.1       | 18.2        |
| 10.62        | 2-Methoxy-5-methylphenol                   | G-type         | -           | 17.4        | -           | 25.2       | 20.5        |
| 10.79        | Phenol, 2-methoxy-3-methyl                 | G-type         | 1.0         | 0.9         | 1.3         | 1.9        | -           |
| 11.13        | m-Guaiacol                                 | G-type         | 0.3         | -           | -           | -          | -           |
| 11.61        | 1,2-Benzenediol, 3-methoxy                 | G-type         | 1.6         | -           | -           | -          | -           |
| 11.89        | Phenol, 4-ethyl-2-methoxy                  | G-type         | 5.5         | 7.6         | 7.5         | 8          | 6.8         |
| 12.39        | 2-Methoxy-4-vinylphenol                    | G-type         | -           | -           | -           | 10.6       | -           |
| 12.49        | 3-Methoxy-5-methylphenol                   | G-type         | 0.8         | 0.5         | 0.9         | -          | -           |
| 12.96        | Phenol, 2-methoxy-3-(2-propenyl)-          | G-type         | -           | -           | -           | 1.2        | 1.2         |
| 12.96        | 3-Allyl-6-methoxyphenol                    | G-type         | -           | 3.2         | 2.7         | -          | -           |
| 13.02        | Ethanone, 1-(2-hydroxy-6-methoxyphenyl)    | G-type         | 1.0         | -           | -           | -          | -           |
| 13.11        | Phenol, 2-methoxy-4-propyl                 | G-type         | 2.9         | 2.2         | 2.1         | 2.1        | 1.2         |
| 13.59        | Vanillin                                   | G-type         | 11.5        | 8.2         | 5.3         | 1.9        | -           |
| 14.14        | Phenol, 4-methoxy-3-(methoxymethyl)        | G-type         | 0.8         | -           | -           | -          | -           |
| 14.22        | Phenol, 2-methoxy-4-(1-propenyl)-, (Z)-    | G-type         | -           | -           | -           | 3.5        | -           |
| 14.23        | Eugenol                                    | G-type         | 4.0         | 9.8         | 8.9         | -          | -           |
| 14.25        | trans-Isoeugenol                           | G-type         | 13.4        | 2.3         | 2.6         | -          | 4.2         |
| 14.69        | Apocynin                                   | G-type         | 4.3         | 2.8         | 4.7         | 1.5        | 1.6         |
| 15.19        | 2-Propanone, 1-(4-hydroxy-3-methoxyphenyl) | G-type         | 3.7         | 2.5         | 2.2         | -          | 1.2         |
| 15.74        | 4-(1-Hydroxyallyl)-2-                      | G-type         | -           | 0.9         | -           | -          | -           |

|              |                                                                       |                             |             |             |             |             |             |
|--------------|-----------------------------------------------------------------------|-----------------------------|-------------|-------------|-------------|-------------|-------------|
| 15.76        | methoxyphenol<br>2-Propanone, 1-hydroxy-3-(4-hydroxy-3-methoxyphenyl) | G-type                      | 0.4         | -           | 0.8         | 1.1         | -           |
| 15.87        | 1-(2-Hydroxy-4-methoxyphenyl) propan-1-one                            | G-type                      | 1.3         | -           | -           | -           | -           |
| 16.62        | Benzenepropanol, 4-hydroxy-3-methoxy                                  | G-type                      | 0.6         | -           | -           | -           | -           |
| <b>Total</b> |                                                                       | <b>G-type</b>               | <b>64.2</b> | <b>72.3</b> | <b>55.3</b> | <b>79.1</b> | <b>54.9</b> |
| 12.88        | Phenol, 2,6-dimethoxy                                                 | S-type                      | 0.6         | -           | -           | -           | -           |
| 17.36        | Ethanone, 1-(4-hydroxy-3,5-dimethoxyphenyl)                           | S-type                      | -           | 1.1         | 1.0         | -           | -           |
| <b>Total</b> |                                                                       | <b>S-type</b>               | <b>0.6</b>  | <b>1.1</b>  | <b>1.0</b>  | <b>0</b>    | <b>0</b>    |
| 11.02        | Benzofuran, 2,3-dihydro                                               | Heterocyclic                | 0.8         | 0.8         | 0.9         | -           | -           |
| 14.64        | 6-Methoxy-3-methylbenzofuran                                          | Heterocyclic                | 0.5         | -           | -           | -           | -           |
| 16.67        | Ethanone, 1-[5-(2-furanylmethyl)-2-furanyl]                           | Heterocyclic                | 0.4         | -           | -           | -           | -           |
| <b>Total</b> |                                                                       | <b>Heterocyclic</b>         | <b>1.7</b>  | <b>0.8</b>  | <b>0.9</b>  | <b>-</b>    | <b>-</b>    |
| 3.63         | Toluene                                                               | Aromatic hydrocarbon        | -           | -           | -           | 1.9         | 2.4         |
| 5.34         | p-Xylene                                                              | Aromatic hydrocarbon        | -           | -           | -           | 2.0         | 2.2         |
| 5.73         | Benzene, 1,3-dimethyl                                                 | Aromatic hydrocarbon        | -           | -           | -           | -           | 4.1         |
| 6.95         | Benzene, 1-ethyl-3-methyl                                             | Aromatic hydrocarbon        | -           | -           | -           | 0.8         | -           |
| 7.49         | Benzene, 1,2,3-trimethyl                                              | Aromatic hydrocarbon        | -           | -           | -           | -           | 2.9         |
| 7.96         | Benzene, 1,2,4-trimethyl                                              | Aromatic hydrocarbon        | -           | -           | -           | -           | 1.2         |
| 9.75         | Benzene, 1,2,4,5-tetramethyl                                          | Aromatic hydrocarbon        | -           | -           | -           | -           | 1.9         |
| 11.96        | Benzene, pentamethyl                                                  | Aromatic hydrocarbon        | -           | -           | -           | -           | 3.8         |
| 14.29        | Benzene, hexamethyl                                                   | Aromatic hydrocarbon        | -           | -           | -           | -           | 1.8         |
| <b>Total</b> |                                                                       | <b>Aromatic hydrocarbon</b> | <b>-</b>    | <b>-</b>    | <b>-</b>    | <b>4.7</b>  | <b>20.3</b> |
| 3.30         | Disulfide, dimethyl                                                   | Other-type                  | 0.3         | 0.8         | -           | 1.2         | 2.7         |
| 8.45         | 3-Cyclopentylpropionic acid, 2-methylphenyl ester                     | Other-type                  | 0.3         | -           | -           | -           | -           |
| 9.28         | 2-Cyclopenten-1-one, 2,3,4,5-tetramethyl-                             | Other-type                  | -           | -           | -           | 0.3         | -           |
| 11.28        | 3,4-Dimethoxytoluene                                                  | Other-type                  | -           | 1.2         | -           | 1.7         | 1.5         |
| 11.30        | 2,3-Dimethoxytoluene                                                  | Other-type                  | 0.8         | -           | 1.2         | -           | -           |

|       |                                                  |                   |            |            |            |            |          |
|-------|--------------------------------------------------|-------------------|------------|------------|------------|------------|----------|
| 12.58 | 1,4-Dimethoxy-2,3-dimethylbenzene                | Other-type        | 0.4        | -          | -          | -          | -        |
| 13.48 | Benzene, 4-ethenyl-1,2-dimethoxy                 | Other-type        | 1.8        | 1.2        | 1.4        | -          | -        |
| 14.12 | 1,2,3-Trimethoxybenzene                          | Other-type        | -          | 0.5        | -          | -          | -        |
| 14.91 | 1,2-Dimethoxy-4-n-propylbenzene                  | Other-type        | 0.7        | 0.7        | 0.7        | -          | -        |
| 15.06 | Benzoic acid, 4-hydroxy-3-methoxy-, methyl ester | Other-type        | 0.6        | -          | -          | -          | -        |
| 15.27 | Benzene, 1-methoxy-4-methyl-2-(1-methylethyl)    | Other-type        | -          | -          | -          | 1.7        | -        |
| 15.29 | o-Isopropylphenetole                             | Other-type        | -          | -          | -          | -          | 1.3      |
| 15.45 | 2-Allyl-1,4-dimethoxybenzene                     | Other-type        | 0.3        | -          | -          | -          | -        |
| 15.87 | 1,6-Anhydro-. beta. -D-glucofuranose             | Other-type        | -          | -          | -          | -          | 1.4      |
| 15.91 | B-methyl cinnamic acid, methyl ester             | Other-type        | 0.7        | -          | -          | -          | -        |
| 16.78 | 4-Methyl-6-methoxycoumarin                       | Other-type        | 0.3        | -          | -          | -          | -        |
| 16.89 | 2-Naphthalenol, 3-methoxy                        | Other-type        | 0.2        | -          | -          | -          | -        |
| 17.46 | Methyl 9-methyltetradecanoate                    | Other-type        | -          | 0.5        | -          | -          | -        |
| 19.57 | Hexadecenoic acid, methyl ester                  | Other-type        | -          | 3.7        | 1.1        | -          | -        |
| 19.89 | Dibutyl phthalate                                | Other-type        | -          | -          | 0.9        | -          | -        |
| 20.27 | Methyl dehydroabietate                           | Other-type        | -          | -          | -          | 1.7        | -        |
| 21.5  | Methyl stearate                                  | Other-type        | -          | 1.2        | -          | -          | -        |
| 22.73 | 1,1'-Biphenyl, 6-hydroxy-2',3',4'-trimethoxy     | Other-type        | -          | -          | 0.8        | -          | -        |
| 25.92 | 1,1'-Biphenyl-3,4,4'-trimethoxy-6'-formyl        | Other-type        | -          | -          | 1.0        | -          | -        |
| 31.04 | cis-Valerenyl acetate                            | Other-type        | -          | -          | -          | -          | 2.1      |
|       | <b>TOTAL</b>                                     | <b>Other-type</b> | <b>6.4</b> | <b>9.8</b> | <b>5.3</b> | <b>6.6</b> | <b>9</b> |

**Table S3:** Distribution of GC-MS compounds obtained from the flash pyrolysis of dealkaline lignin

| Ret Time     | Compound Name, Dealkaline lignin           | Compound types | Blank      | MgO         | CaO         | ZSM-5       | Y-zeolite   |
|--------------|--------------------------------------------|----------------|------------|-------------|-------------|-------------|-------------|
| 7.20         | Phenol                                     | H-type         | 0.6        | 0.8         | 1.4         | 4.6         | 3.0         |
| 8.43         | Phenol, 2-methyl                           | H-type         | -          | -           | 0.7         | -           | 1.3         |
| 8.80         | Phenol, 3-methyl                           | H-type         | -          | -           | -           | 1.5         | 0.7         |
| 8.81         | p-Cresol                                   | H-type         | -          | -           | 1.1         | -           | -           |
| 10.66        | Creosol                                    | H-type         | -          | 5.1         | -           | 2.6         | 6.0         |
| 12.43        | 4-Hydroxy-2-methylacetophenone             | H-type         | 4.0        | 8.3         | 8.4         | -           | -           |
| <b>Total</b> |                                            | <b>H-type</b>  | <b>4.6</b> | <b>14.2</b> | <b>11.6</b> | <b>8.7</b>  | <b>11</b>   |
| 9.01         | Phenol, 2-methoxy                          | G-type         | -          | 25.2        | 31.0        | 17.5        | -           |
| 9.04         | Mequinol/Phenol, 4-methoxy                 | G-type         | 21         | -           | -           | 24.0        | 28.0        |
| 10.62        | 2-Methoxy-5-methylphenol                   | G-type         | 2.9        | -           | 12.7        | -           | 0.7         |
| 10.79        | Phenol, 2-methoxy-3-methyl                 | G-type         | -          | -           | -           | 1.8         | -           |
| 11.89        | Phenol, 4-ethyl-2-methoxy-                 | G-type         | 0.6        | 2.0         | 4.0         | 0.6         | 1.9         |
| 12.39        | 2-Methoxy-4-vinylphenol                    | G-type         | -          | -           | -           | -           | 3.6         |
| 12.96        | Phenol, 2-methoxy-3-(2-propenyl)           | G-type         | -          | -           | 0.7         | -           | -           |
| 13.58        | Benzaldehyde, 3-hydroxy-4-methoxy          | G-type         | 37.3       | -           | -           | -           | -           |
| 13.59        | Vanillin                                   | G-type         | -          | 23          | 11.0        | 10.1        | 8.5         |
| 13.66        | Phenol, 2-methoxy-5-(1-propenyl)-, (E)     | G-type         | -          | 1.1         | 1.4         | 1.5         | -           |
| 14.22        | Phenol, 2-methoxy-4-(1-propenyl)           | G-type         | -          | -           | -           | -           | 1.6         |
| 14.23        | Eugenol                                    | G-type         | 2.2        | 1.0         | 5.6         | -           | -           |
| 14.25        | trans-Isoeugenol                           | G-type         | -          | 3.8         | -           | -           | -           |
| 14.30        | 3-Methoxytyrosine                          | G-type         | 0.4        | -           | -           | -           | -           |
| 14.69        | Apocynin                                   | G-type         | 7.6        | 4.6         | 2.9         | 5.5         | -           |
| 15.19        | 2-Propanone, 1-(4-hydroxy-3-methoxyphenyl) | G-type         | -          | 1.7         | 1.9         | 0.6         | -           |
| 15.74        | 4-(1-Hydroxyallyl)-2-methoxyphenol         | G-type         | -          | 1.3         | -           | -           | -           |
| <b>Total</b> |                                            | <b>G-type</b>  | <b>72</b>  | <b>63.7</b> | <b>71.2</b> | <b>61.6</b> | <b>44.3</b> |
| 12.88        | Phenol, 2,6-dimethoxy                      | S-type         | 4.6        | 3.5         | 5.1         | 1.0         | 2.9         |
| 14.13        | 3,5-Dimethoxy-4-hydroxytoluene             | S-type         | 0.3        | -           | -           | -           | -           |
| 15.62        | Ethanone, 1-(3,4-dimethoxyphenyl)          | S-type         | -          | 0.9         | 0.7         | -           | -           |
| <b>Total</b> |                                            | <b>S-type</b>  | <b>4.9</b> | <b>4.4</b>  | <b>5.8</b>  | <b>1.0</b>  | <b>2.9</b>  |

|       |                                       |                      |            |            |            |          |            |
|-------|---------------------------------------|----------------------|------------|------------|------------|----------|------------|
| 5.99  | Butyrolactone                         | Heterocyclic         | 0.9        | 0.7        | -          | -        | -          |
| 6.53  | 2,5-Furandione, 3-methyl              | Heterocyclic         | 0.2        | -          | -          | -        | -          |
| 7.08  | 2(5H)-Furanone, 3-methyl-             | Heterocyclic         | -          | -          | 1.0        | -        | -          |
| 7.11  | 2(5H)-Furanone, 3-methyl              | Heterocyclic         | -          | 0.7        | -          | -        | -          |
| 7.43  | 2-Hydroxy-gamma-butylolactone         | Heterocyclic         | 6.4        | 1.2        | 1.0        | -        | 0.4        |
| 15.91 | Butyrovaniillone                      | Heterocyclic         | 0.7        | -          | -          | -        | -          |
|       | <b>Total</b>                          | <b>Heterocyclic</b>  | <b>8.2</b> | <b>2.6</b> | <b>2.0</b> | <b>0</b> | <b>0.4</b> |
| 3.63  | Toluene                               | Aromatic hydrocarbon | -          | -          | -          | 2.9      | 4.2        |
| 5.34  | p-Xylene                              | Aromatic hydrocarbon | -          | -          | -          | -        | 5.0        |
| 5.48  | Ethylbenzene                          | Aromatic hydrocarbon | -          | -          | -          | 1.3      | -          |
| 5.63  | o-Xylene                              | Aromatic hydrocarbon | -          | -          | -          | 7.9      | -          |
| 5.73  | Benzene, 1,3-dimethyl                 | Aromatic hydrocarbon | -          | -          | -          | -        | 3.2        |
| 6.00  | Styrene                               | Aromatic hydrocarbon | -          | -          | -          | 0.4      | -          |
| 6.95  | Benzene, 1-ethyl-3-methyl             | Aromatic hydrocarbon | -          | -          | -          | -        | 1.7        |
| 7.26  | Benzene, 1-ethyl-4-methyl             | Aromatic hydrocarbon | -          | -          | -          | 1.8      | -          |
| 7.49  | Benzene, 1,2,3-trimethyl              | Aromatic hydrocarbon | -          | -          | -          | -        | 4.3        |
| 7.96  | Benzene, 1,2,4-trimethyl              | Aromatic hydrocarbon | -          | -          | -          | -        | 1.0        |
| 8.00  | Benzene, 1-methyl-3-(1-methylethyl)   | Aromatic hydrocarbon | 0.7        | -          | -          | -        | -          |
| 8.18  | Indane                                | Aromatic hydrocarbon | -          | -          | -          | -        | 0.5        |
| 8.30  | o-Cymene                              | Aromatic hydrocarbon | -          | -          | -          | 1.1      | 1.2        |
| 9.09  | Benzene, 1-methyl-3-(1-methylethenyl) | Aromatic hydrocarbon | -          | 0.8        | -          | -        | -          |
| 9.56  | Benzene, 1,2,3,4-tetramethyl          | Aromatic hydrocarbon | -          | -          | -          | -        | 2.2        |
| 9.75  | Benzene, 1,2,4,5-tetramethyl          | Aromatic hydrocarbon | -          | -          | -          | -        | 2.8        |
| 11.96 | Benzene, pentamethyl                  | Aromatic hydrocarbon | -          | -          | -          | -        | 3.3        |
| 14.29 | Benzene, hexamethyl                   | Aromatic hydrocarbon | -          | -          | -          | -        | 1.5        |



|       | <b>Total</b>                                                   | <b>Aromatic hydrocarbon</b> | <b>0.7</b> | <b>0.8</b> | <b>0</b> | <b>15.4</b> | <b>30.9</b> |
|-------|----------------------------------------------------------------|-----------------------------|------------|------------|----------|-------------|-------------|
| 1.92  | 2-Butanone                                                     | Other-type                  | -          | -          | 1        | -           | -           |
| 2.13  | 3-Cyclopentene-1,2-diol, cis                                   | Other-type                  | -          | -          | -        | 4           | -           |
| 2.40  | 1-Butanol                                                      | Other-type                  | -          | 1.6        | -        | -           | -           |
| 3.19  | Propanoic acid, 2-hydroxy-, methyl ester                       | Other-type                  | 0.8        | -          | -        | -           | -           |
| 3.30  | Disulfide, dimethyl                                            | Other-type                  | -          | -          | -        | -           | 2.0         |
| 5.03  | 2-Cyclopenten-1-one                                            | Other-type                  | -          | -          | -        | 1.4         | -           |
| 5.69  | Lactic acid                                                    | Other-type                  | 0.8        | -          | -        | -           | -           |
| 6.27  | 1,2-Cyclopentanedione                                          | Other-type                  | 1.0        | -          | -        | -           | -           |
| 6.30  | 2-Cyclopenten-1-one, 2-methyl                                  | Other-type                  | -          | -          | -        | 0.8         | 0.6         |
| 6.73  | Camphene                                                       | Other-type                  | 0.3        | -          | -        | -           | -           |
| 7.10  | N-Hexylmethacrylamide                                          | Other-type                  | 0.7        | -          | -        | -           | -           |
| 7.95  | Mesitylene                                                     | Other-type                  | -          | -          | -        | -           | 2.0         |
| 8.17  | 1,3-Cyclohexadiene, 1-methyl-4-(1-methylethyl)                 | Other-type                  | -          | -          | -        | 1.0         | -           |
| 9.09  | Benzenepropanamine, alpha.-methyl                              | Other-type                  | -          | -          | 0.8      | -           | -           |
| 9.11  | Cyclopropyl carbinol                                           | Other-type                  | 2.3        | -          | -        | -           | -           |
| 9.57  | Nonanal                                                        | Other-type                  | -          | -          | -        | 0.9         | -           |
| 9.89  | Benzene, 1,2-dimethoxy                                         | Other-type                  | -          | 2.2        | 3.1      | -           | 2.0         |
| 11.13 | Decanal                                                        | Other-type                  | -          | -          | -        | 0.7         | -           |
| 11.28 | 3,4-Dimethoxytoluene                                           | Other-type                  | -          | 1.9        | -        | 1.4         | 1.6         |
| 11.30 | 2,3-Dimethoxytoluene                                           | Other-type                  | -          | -          | 2.4      | -           | -           |
| 13.48 | Benzene, 4-ethyl-1,2-dimethoxy                                 | Other-type                  | -          | 0.6        | 1.0      | 0.3         | -           |
| 13.67 | Benzene, 1,2-dimethoxy-4-[[[(4-methylphenyl) sulfonyl] methyl] | Other-type                  | 1.5        | -          | -        | -           | -           |
| 14.59 | Benzaldehyde, 3,4-dimethoxy                                    | Other-type                  | -          | 1.2        | -        | -           | -           |
| 15.06 | Benzoic acid, 4-hydroxy-3-methoxy-, methyl ester               | Other-type                  | 0.4        | -          | -        | -           | -           |
| 15.19 | 2-Propanone, 1-(4-hydroxy-3-methoxyphenyl)                     | Other-type                  | 1.2        | -          | -        | -           | -           |
| 15.62 | 6-Methoxycoumaran-7-ol-3-one                                   | Other-type                  | 0.2        | -          | -        | -           | -           |
| 15.80 | Dodecanoic acid                                                | Other-type                  | -          | -          | -        | 0.3         | -           |
| 18.06 | Tetradecanoic acid                                             | Other-type                  | -          | -          | -        | 1.3         | -           |

|       |                                                            |                   |            |             |            |             |            |
|-------|------------------------------------------------------------|-------------------|------------|-------------|------------|-------------|------------|
| 18.94 | 1,2-Benzenedicarboxylic acid,<br>bis(2-methylpropyl) ester | Other-type        | 0.2        | -           | -          | -           | -          |
| 19.12 | Pentadecanoic acid                                         | Other-type        | -          | -           | -          | 0.7         | -          |
| 19.57 | Hexadecanoic acid, methyl<br>ester                         | Other-type        | -          | 2.8         | 1.0        | -           | 1.5        |
| 19.89 | Dibutyl phthalate                                          | Other-type        | 0.2        | 1.5         | -          | -           | -          |
| 21.50 | Methyl stearate                                            | Other-type        | -          | 2.1         | -          | -           | -          |
|       |                                                            | Other-type        |            |             |            |             |            |
|       | <b>Total</b>                                               | <b>Other-type</b> | <b>9.6</b> | <b>13.9</b> | <b>9.3</b> | <b>12.8</b> | <b>9.7</b> |
